# Supplementary material for: Inhibition of hen egg white lysozyme fibrillation by a self-assembled nanostructured lysozyme and graphene oxide conjugate
Source: Royal Society of Chemistry journal article supplement (doi:10.1039/d3nj02831c), 2023-01-01
Supplement: d3nj02831c1.pdf [file d3nj02831c1.pdf]

## Supplementary Information

### **Inhibition of hen egg white lysozyme fibrillation by self-assembled nanostructured lysozyme and graphene oxide conjugate**

Uma Sankar Mondal, Subhankar Paul\*

Department of Biotechnology and Medical Engineering, National Institute of Technology, Rourkela

\*Correspondence: **Dr. Subhankar Paul**, Professor, Structural Biology and Nanomedicine Laboratory, Department of Biotechnology and Medical Engineering, National Institute of Technology Rourkela, Rourkela-769008, Odisha, India, E-mail: [spaul@nitrkl.ac.in](mailto:spaul@nitrkl.ac.in),

Phone: +91-0661-2462284 +91-0661-2463284 (R), Fax: +91-0661-2462022.

## 1. Preparation of BSA nanoparticles

BSA nanoparticles (nBSA) were synthesized using a desolvation method with minor modifications<sup>1</sup>. 2 mg/mL of BSA powder was added to milli-Q water and the mixture was magnetically stirred at 500 rpm until the protein powder was totally dissolved. The pH of the solution was adjusted to 9 with 0.1 M NaOH. A desolvating agent, ethanol was added dropwise at a rate of 1 ml/min into the BSA solutions until the solutions became turbid. After that 0.1 % v/v of glutaraldehyde was added to achieve intra-particle cross-linking. The solution was stirred overnight at 500 rpm. The solution was centrifuged at 20,000 g for 10 min and repeated the washing procedure for five cycles to remove the excess glutaraldehyde. The nBSA particles were collected and re-dispersed in milli-Q water and preserved at 4°C for experimental use.

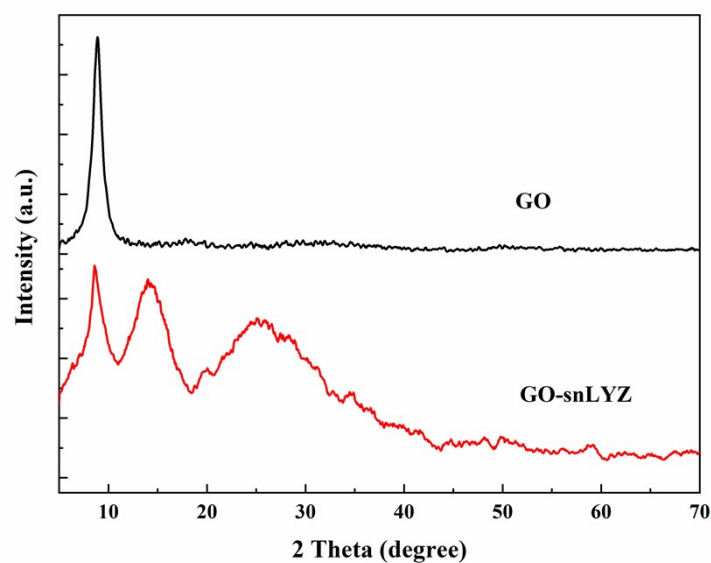

**Figure S1.** XRD spectra of GO and GO-snLYZ nanoconjugate

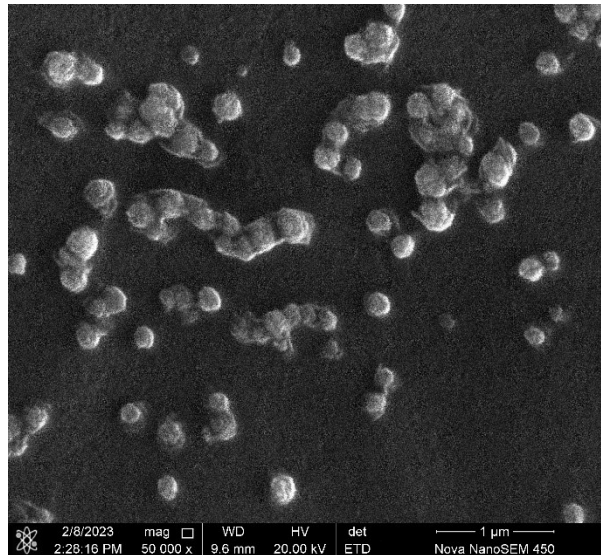

**Figure S2.** FESEM image of BSA nanoparticles

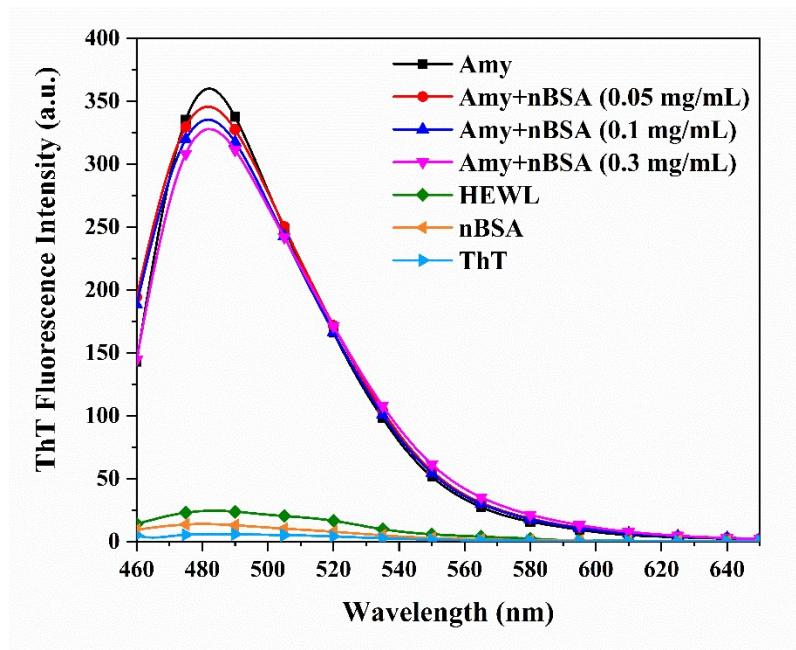

**Figure S3.** ThT fluorescence spectra of HEWL amyloid samples prepared in the presence of nBSA particles.

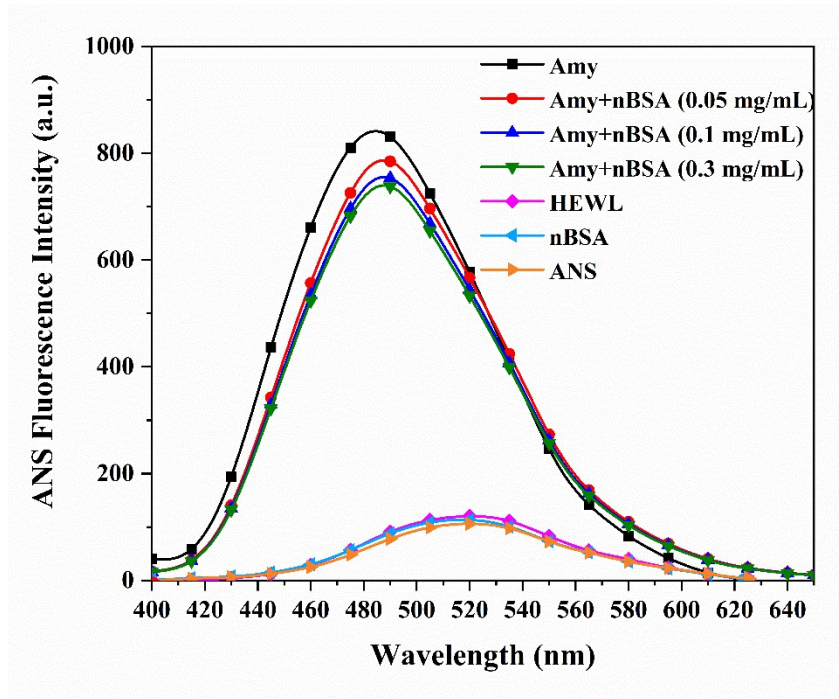

**Figure S4.** ANS fluorescence spectra of HEWL amyloid samples prepared in the presence of nBSA particles.

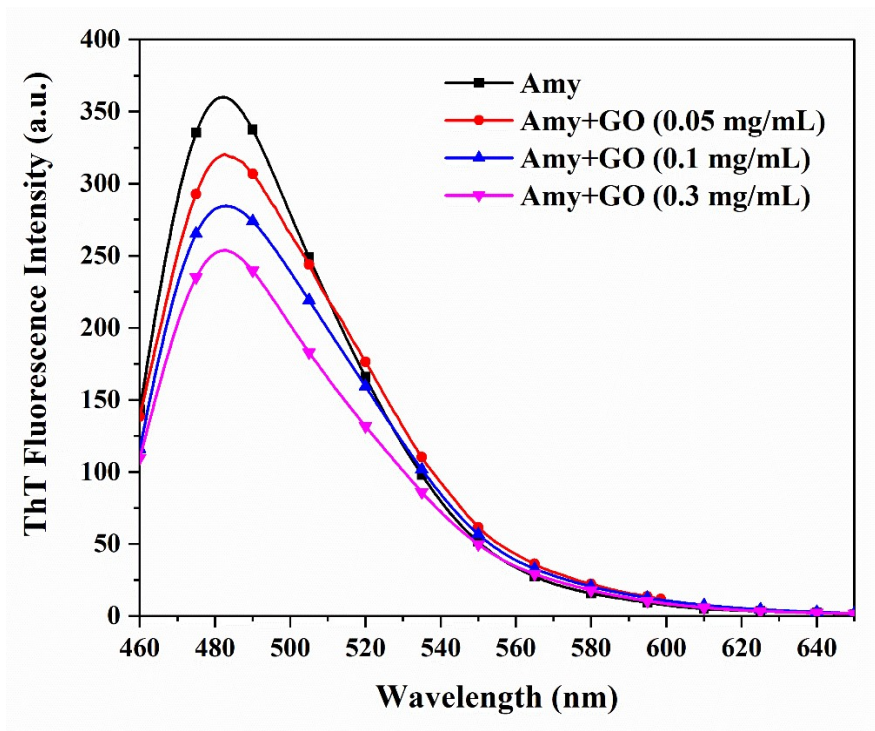

**Figure S5.** ThT fluorescence spectra of HEWL amyloid samples prepared in the presence of GO.

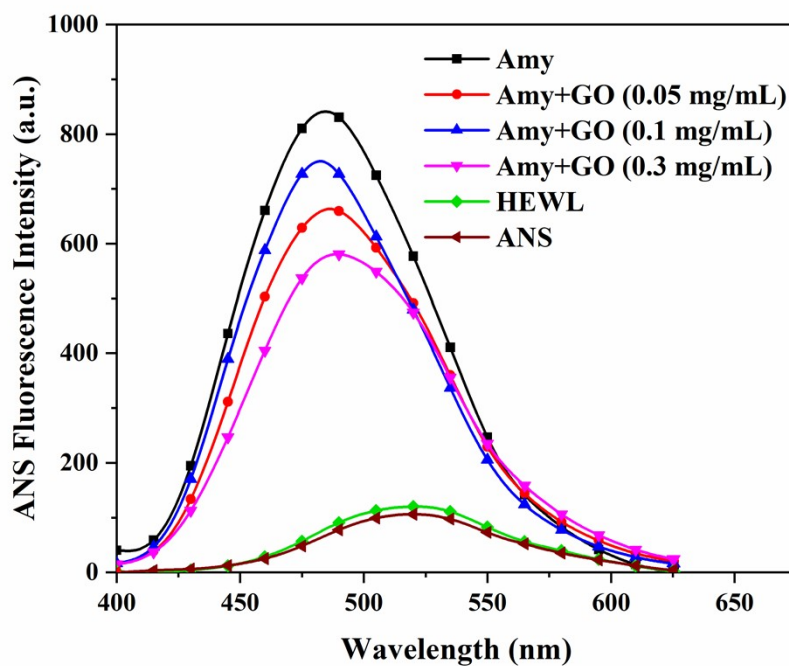

**Figure S6.** ANS fluorescence spectra of HEWL amyloid samples prepared in the presence of GO.

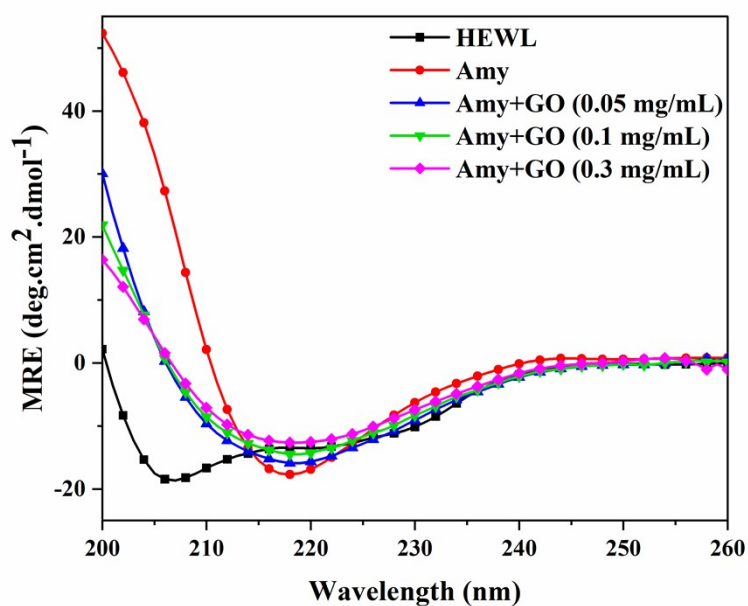

**Figure S7.** Far UV-CD spectra of HEWL amyloid samples prepared in the presence of GO.

**Table S1.**

| Sample              | $\alpha$ -helix (%) | $\beta$ -sheet (%) | Unordered structure (%) |
|---------------------|---------------------|--------------------|-------------------------|
| Amy+GO (0.05 mg/mL) | 12.2                | 60.4               | 27.4                    |
| Amy+GO (0.1 mg/mL)  | 12.7                | 58.4               | 28.9                    |
| Amy+GO (0.3 mg/mL)  | 13.8                | 53.6               | 32.6                    |

**References**

1. Jun JY, Nguyen HH, Paik S-Y-R, Chun HS, Kang B-C, Ko S. Preparation of size-controlled bovine serum albumin (BSA) nanoparticles by a modified desolvation method. *Food Chem.* 2011;127(4):1892-1898. doi:<https://doi.org/10.1016/j.foodchem.2011.02.040>
